# Supplementary material for: Safety and Efficacy of Bimekizumab in Patients With Active Psoriatic Arthritis: Three‐Year Results From a Phase IIb Randomized Controlled Trial and Its Open‐Label Extension Study
Source: PubMed Central journal article supplement — Arthritis Rheumatol. 2022 Nov 18;74(12):1959–70. doi: 10.1002/art.42280 (PMC10100448; doi:10.1002/art.42280), 2022-11-18
Supplement: ART-74-1959-s003.pdf [file ART-74-1959-s003.pdf]

## ICMJE DISCLOSURE FORM

**Date:** 9 May 2022

**Your Name:** Laura C. Coates

**Manuscript Title:** Safety and Efficacy of Bimekizumab in Patients with Active Psoriatic Arthritis: 3-Year Results from a Phase 2b Randomized Controlled Trial and its Open-Label Extension Study

**Manuscript number (if known):** ar-22-0051.R1

In the interest of transparency, we ask you to disclose all relationships/activities/interests listed below that are related to the content of your manuscript. “Related” means any relation with for-profit or not-for-profit third parties whose interests may be affected by the content of the manuscript. Disclosure represents a commitment to transparency and does not necessarily indicate a bias. If you are in doubt about whether to list a relationship/activity/interest, it is preferable that you do so.

The following questions apply to the author’s relationships/activities/interests as they relate to the current manuscript only.

The author’s relationships/activities/interests should be defined broadly. For example, if your manuscript pertains to the epidemiology of hypertension, you should declare all relationships with manufacturers of antihypertensive medication, even if that medication is not mentioned in the manuscript.

In item #1 below, report all support for the work reported in this manuscript without time limit. For all other items, the time frame for disclosure is the past 36 months.

|                                                           |                                                                                                                                                                                | Name all entities with whom you have this relationship or indicate none (add rows as needed) | Specifications/Comments (e.g., if payments were made to you or to your institution) |
|-----------------------------------------------------------|--------------------------------------------------------------------------------------------------------------------------------------------------------------------------------|----------------------------------------------------------------------------------------------|-------------------------------------------------------------------------------------|
| <b>Time frame: Since the initial planning of the work</b> |                                                                                                                                                                                |                                                                                              |                                                                                     |
| 1                                                         | All support for the present manuscript (e.g., funding, provision of study materials, medical writing, article processing charges, etc.)<br><b>No time limit for this item.</b> | UCB Pharma                                                                                   |                                                                                     |
|                                                           |                                                                                                                                                                                | Costello Medical                                                                             |                                                                                     |
|                                                           |                                                                                                                                                                                |                                                                                              |                                                                                     |
|                                                           |                                                                                                                                                                                |                                                                                              |                                                                                     |
|                                                           |                                                                                                                                                                                |                                                                                              |                                                                                     |
|                                                           |                                                                                                                                                                                |                                                                                              |                                                                                     |
|                                                           |                                                                                                                                                                                |                                                                                              |                                                                                     |
| <b>Time frame: past 36 months</b>                         |                                                                                                                                                                                |                                                                                              |                                                                                     |
| 2                                                         | Grants or contracts from any entity (if not indicated in item #1 above).                                                                                                       | AbbVie                                                                                       |                                                                                     |
|                                                           |                                                                                                                                                                                | Amgen                                                                                        |                                                                                     |
|                                                           |                                                                                                                                                                                | Celgene                                                                                      |                                                                                     |
|                                                           |                                                                                                                                                                                | Eli Lilly                                                                                    |                                                                                     |
|                                                           |                                                                                                                                                                                | Janssen                                                                                      |                                                                                     |
|                                                           |                                                                                                                                                                                | Novartis                                                                                     |                                                                                     |
|                                                           |                                                                                                                                                                                | Pfizer                                                                                       |                                                                                     |
|                                                           | UCB Pharma                                                                                                                                                                     |                                                                                              |                                                                                     |

|            |                                                                                                              |                      |  |
|------------|--------------------------------------------------------------------------------------------------------------|----------------------|--|
| 3          | Royalties or licenses                                                                                        | ___ None             |  |
|            |                                                                                                              |                      |  |
|            |                                                                                                              |                      |  |
| 4          | Consulting fees                                                                                              | AbbVie               |  |
|            |                                                                                                              | Amgen                |  |
|            |                                                                                                              | Boehringer Ingelheim |  |
|            |                                                                                                              | BMS                  |  |
|            |                                                                                                              | Celgene              |  |
|            |                                                                                                              | Eli Lilly            |  |
|            |                                                                                                              | Gilead               |  |
|            |                                                                                                              | Galapagos            |  |
|            |                                                                                                              | Janssen              |  |
|            |                                                                                                              | Novartis             |  |
|            |                                                                                                              | Pfizer               |  |
| UCB Pharma |                                                                                                              |                      |  |
| 5          | Payment or honoraria for lectures, presentations, speakers bureaus, manuscript writing or educational events | AbbVie               |  |
|            |                                                                                                              | Amgen                |  |
|            |                                                                                                              | Biogen               |  |
|            |                                                                                                              | Celgene              |  |
|            |                                                                                                              | Eli Lilly            |  |
|            |                                                                                                              | Galapagos            |  |
|            |                                                                                                              | Gilead               |  |
|            |                                                                                                              | Janssen              |  |
|            |                                                                                                              | Medac                |  |
|            |                                                                                                              | Novartis             |  |
|            |                                                                                                              | Pfizer               |  |
| UCB Pharma |                                                                                                              |                      |  |
| 6          | Payment for expert testimony                                                                                 | ___ None             |  |
|            |                                                                                                              |                      |  |
|            |                                                                                                              |                      |  |
| 7          | Support for attending meetings and/or travel                                                                 | ___ None             |  |
|            |                                                                                                              |                      |  |
|            |                                                                                                              |                      |  |
| 8          | Patents planned, issued or pending                                                                           | ___ None             |  |
|            |                                                                                                              |                      |  |
|            |                                                                                                              |                      |  |
| 9          | Participation on a Data Safety Monitoring Board or Advisory Board                                            | ___ None             |  |
|            |                                                                                                              |                      |  |
|            |                                                                                                              |                      |  |
| 10         | Leadership or fiduciary role in other board, society, committee or advocacy group, paid or unpaid            | ___ None             |  |
|            |                                                                                                              |                      |  |
|            |                                                                                                              |                      |  |
| 11         | Stock or stock options                                                                                       | ___ None             |  |
|            |                                                                                                              |                      |  |
|            |                                                                                                              |                      |  |
| 12         | Receipt of equipment, materials, drugs, medical                                                              | ___ None             |  |
|            |                                                                                                              |                      |  |

|    |                                            |                  |  |
|----|--------------------------------------------|------------------|--|
|    | writing, gifts or other services           |                  |  |
| 13 | Other financial or non-financial interests | <u>    </u> None |  |
|    |                                            |                  |  |
|    |                                            |                  |  |

Please place an "X" next to the following statement to indicate your agreement:

  X   I certify that I have answered every question and have not altered the wording of any of the questions on this form.

## ICMJE DISCLOSURE FORM

**Date:** 9 May 2022

**Your Name:** Iain B. McInnes

**Manuscript Title:** Safety and Efficacy of Bimekizumab in Patients with Active Psoriatic Arthritis: 3-Year Results from a Phase 2b Randomized Controlled Trial and its Open-Label Extension Study

**Manuscript number (if known):** ar-22-0051.R1

In the interest of transparency, we ask you to disclose all relationships/activities/interests listed below that are related to the content of your manuscript. "Related" means any relation with for-profit or not-for-profit third parties whose interests may be affected by the content of the manuscript. Disclosure represents a commitment to transparency and does not necessarily indicate a bias. If you are in doubt about whether to list a relationship/activity/interest, it is preferable that you do so.

The following questions apply to the author's relationships/activities/interests as they relate to the current manuscript only.

The author's relationships/activities/interests should be defined broadly. For example, if your manuscript pertains to the epidemiology of hypertension, you should declare all relationships with manufacturers of antihypertensive medication, even if that medication is not mentioned in the manuscript.

In item #1 below, report all support for the work reported in this manuscript without time limit. For all other items, the time frame for disclosure is the past 36 months.

|                                                           |                                                                                                                                                                                | Name all entities with whom you have this relationship or indicate none (add rows as needed) | Specifications/Comments (e.g., if payments were made to you or to your institution) |
|-----------------------------------------------------------|--------------------------------------------------------------------------------------------------------------------------------------------------------------------------------|----------------------------------------------------------------------------------------------|-------------------------------------------------------------------------------------|
| <b>Time frame: Since the initial planning of the work</b> |                                                                                                                                                                                |                                                                                              |                                                                                     |
| 1                                                         | All support for the present manuscript (e.g., funding, provision of study materials, medical writing, article processing charges, etc.)<br><b>No time limit for this item.</b> | UCB Pharma                                                                                   |                                                                                     |
|                                                           |                                                                                                                                                                                | Costello Medical                                                                             |                                                                                     |
|                                                           |                                                                                                                                                                                |                                                                                              |                                                                                     |
|                                                           |                                                                                                                                                                                |                                                                                              |                                                                                     |
|                                                           |                                                                                                                                                                                |                                                                                              |                                                                                     |
|                                                           |                                                                                                                                                                                |                                                                                              |                                                                                     |
|                                                           |                                                                                                                                                                                |                                                                                              |                                                                                     |
| <b>Time frame: past 36 months</b>                         |                                                                                                                                                                                |                                                                                              |                                                                                     |
| 2                                                         | Grants or contracts from any entity (if not indicated in item #1 above).                                                                                                       | BMS                                                                                          |                                                                                     |
|                                                           |                                                                                                                                                                                | Boehringer Ingelheim                                                                         |                                                                                     |
|                                                           |                                                                                                                                                                                | Celgene                                                                                      |                                                                                     |
|                                                           |                                                                                                                                                                                | GSK                                                                                          |                                                                                     |
|                                                           |                                                                                                                                                                                | Eli Lilly                                                                                    |                                                                                     |
|                                                           |                                                                                                                                                                                | Janssen                                                                                      |                                                                                     |
|                                                           |                                                                                                                                                                                | Novartis                                                                                     |                                                                                     |
|                                                           | UCB Pharma                                                                                                                                                                     |                                                                                              |                                                                                     |

|    |                                                                                                              |                      |  |
|----|--------------------------------------------------------------------------------------------------------------|----------------------|--|
|    |                                                                                                              |                      |  |
| 3  | Royalties or licenses                                                                                        | ___ None             |  |
|    |                                                                                                              |                      |  |
|    |                                                                                                              |                      |  |
| 4  | Consulting fees                                                                                              | AbbVie               |  |
|    |                                                                                                              | AstraZeneca          |  |
|    |                                                                                                              | Boehringer Ingelheim |  |
|    |                                                                                                              | BMS                  |  |
|    |                                                                                                              | Celgene              |  |
|    |                                                                                                              | Eli Lilly            |  |
|    |                                                                                                              | Evelo                |  |
|    |                                                                                                              | Janssen              |  |
|    |                                                                                                              | Novartis             |  |
|    |                                                                                                              | Pfizer               |  |
|    |                                                                                                              | Sanofi-Regeneron     |  |
|    |                                                                                                              | UCB Pharma           |  |
| 5  | Payment or honoraria for lectures, presentations, speakers bureaus, manuscript writing or educational events | AbbVie               |  |
|    |                                                                                                              | AstraZeneca          |  |
|    |                                                                                                              | Boehringer Ingelheim |  |
|    |                                                                                                              | BMS                  |  |
|    |                                                                                                              | Celgene              |  |
|    |                                                                                                              | Eli Lilly            |  |
|    |                                                                                                              | Evelo                |  |
|    |                                                                                                              | Janssen              |  |
|    |                                                                                                              | Novartis             |  |
|    |                                                                                                              | Pfizer               |  |
|    |                                                                                                              | Sanofi-Regeneron     |  |
|    |                                                                                                              | UCB Pharma           |  |
| 6  | Payment for expert testimony                                                                                 | ___ None             |  |
|    |                                                                                                              |                      |  |
|    |                                                                                                              |                      |  |
| 7  | Support for attending meetings and/or travel                                                                 | ___ None             |  |
|    |                                                                                                              |                      |  |
|    |                                                                                                              |                      |  |
| 8  | Patents planned, issued or pending                                                                           | ___ None             |  |
|    |                                                                                                              |                      |  |
|    |                                                                                                              |                      |  |
| 9  | Participation on a Data Safety Monitoring Board or Advisory Board                                            | ___ None             |  |
|    |                                                                                                              |                      |  |
|    |                                                                                                              |                      |  |
| 10 | Leadership or fiduciary role in other board, society, committee or advocacy group, paid or unpaid            | ___ None             |  |
|    |                                                                                                              |                      |  |
|    |                                                                                                              |                      |  |
| 11 | Stock or stock options                                                                                       | ___ None             |  |
|    |                                                                                                              |                      |  |
|    |                                                                                                              |                      |  |
| 12 |                                                                                                              | ___ None             |  |

|    |                                                                                  |                  |  |
|----|----------------------------------------------------------------------------------|------------------|--|
|    | Receipt of equipment, materials, drugs, medical writing, gifts or other services |                  |  |
| 13 | Other financial or non-financial interests                                       | <u>    </u> None |  |
|    |                                                                                  |                  |  |
|    |                                                                                  |                  |  |

Please place an "X" next to the following statement to indicate your agreement:

  X   I certify that I have answered every question and have not altered the wording of any of the questions on this form.



|    |                                                                                                              |                  |  |
|----|--------------------------------------------------------------------------------------------------------------|------------------|--|
|    |                                                                                                              |                  |  |
| 3  | Royalties or licenses                                                                                        | ___ None         |  |
|    |                                                                                                              |                  |  |
|    |                                                                                                              |                  |  |
| 4  | Consulting fees                                                                                              | AbbVie           |  |
|    |                                                                                                              | Amgen            |  |
|    |                                                                                                              | Bayer            |  |
|    |                                                                                                              | Biogen           |  |
|    |                                                                                                              | BMS              |  |
|    |                                                                                                              | Celgene          |  |
|    |                                                                                                              | Eli Lilly        |  |
|    |                                                                                                              | Janssen          |  |
|    |                                                                                                              | Novartis         |  |
|    |                                                                                                              | Pfizer           |  |
|    |                                                                                                              | Sanofi-Regeneron |  |
|    |                                                                                                              | UCB Pharma       |  |
| 5  | Payment or honoraria for lectures, presentations, speakers bureaus, manuscript writing or educational events | _ None           |  |
|    |                                                                                                              |                  |  |
|    |                                                                                                              |                  |  |
|    |                                                                                                              |                  |  |
|    |                                                                                                              |                  |  |
|    |                                                                                                              |                  |  |
|    |                                                                                                              |                  |  |
|    |                                                                                                              |                  |  |
|    |                                                                                                              |                  |  |
|    |                                                                                                              |                  |  |
|    |                                                                                                              |                  |  |
| 6  | Payment for expert testimony                                                                                 | ___ None         |  |
|    |                                                                                                              |                  |  |
|    |                                                                                                              |                  |  |
| 7  | Support for attending meetings and/or travel                                                                 | ___ None         |  |
|    |                                                                                                              |                  |  |
|    |                                                                                                              |                  |  |
| 8  | Patents planned, issued or pending                                                                           | ___ None         |  |
|    |                                                                                                              |                  |  |
|    |                                                                                                              |                  |  |
| 9  | Participation on a Data Safety Monitoring Board or Advisory Board                                            | ___ None         |  |
|    |                                                                                                              |                  |  |
|    |                                                                                                              |                  |  |
| 10 | Leadership or fiduciary role in other board, society, committee or advocacy group, paid or unpaid            | ___ None         |  |
|    |                                                                                                              |                  |  |
|    |                                                                                                              |                  |  |
| 11 | Stock or stock options                                                                                       | ___ None         |  |
|    |                                                                                                              |                  |  |
|    |                                                                                                              |                  |  |
| 12 |                                                                                                              | ___ None         |  |



|    |                                                                                  |                                       |                        |
|----|----------------------------------------------------------------------------------|---------------------------------------|------------------------|
|    | Receipt of equipment, materials, drugs, medical writing, gifts or other services |                                       |                        |
| 13 | Other financial or non-financial interests                                       | Dermavant<br>LEO Pharma<br>UCB Pharma | Principal investigator |

Please place an "X" next to the following statement to indicate your agreement:

I certify that I have answered every question and have not altered the wording of any of the questions on this form.

## ICMJE DISCLOSURE FORM

**Date:** 9 May 2022

**Your Name:** Richard B. Warren

**Manuscript Title:** Safety and Efficacy of Bimekizumab in Patients with Active Psoriatic Arthritis: 3-Year Results from a Phase 2b Randomized Controlled Trial and its Open-Label Extension Study

**Manuscript number (if known):** ar-22-0051.R1

In the interest of transparency, we ask you to disclose all relationships/activities/interests listed below that are related to the content of your manuscript. “Related” means any relation with for-profit or not-for-profit third parties whose interests may be affected by the content of the manuscript. Disclosure represents a commitment to transparency and does not necessarily indicate a bias. If you are in doubt about whether to list a relationship/activity/interest, it is preferable that you do so.

The following questions apply to the author’s relationships/activities/interests as they relate to the current manuscript only.

The author’s relationships/activities/interests should be defined broadly. For example, if your manuscript pertains to the epidemiology of hypertension, you should declare all relationships with manufacturers of antihypertensive medication, even if that medication is not mentioned in the manuscript.

In item #1 below, report all support for the work reported in this manuscript without time limit. For all other items, the time frame for disclosure is the past 36 months.

|                                                           |                                                                                                                                                                                | Name all entities with whom you have this relationship or indicate none (add rows as needed) | Specifications/Comments (e.g., if payments were made to you or to your institution) |
|-----------------------------------------------------------|--------------------------------------------------------------------------------------------------------------------------------------------------------------------------------|----------------------------------------------------------------------------------------------|-------------------------------------------------------------------------------------|
| <b>Time frame: Since the initial planning of the work</b> |                                                                                                                                                                                |                                                                                              |                                                                                     |
| 1                                                         | All support for the present manuscript (e.g., funding, provision of study materials, medical writing, article processing charges, etc.)<br><b>No time limit for this item.</b> | UCB Pharma                                                                                   |                                                                                     |
|                                                           |                                                                                                                                                                                | Costello Medical                                                                             |                                                                                     |
|                                                           |                                                                                                                                                                                |                                                                                              |                                                                                     |
|                                                           |                                                                                                                                                                                |                                                                                              |                                                                                     |
|                                                           |                                                                                                                                                                                |                                                                                              |                                                                                     |
|                                                           |                                                                                                                                                                                |                                                                                              |                                                                                     |
|                                                           |                                                                                                                                                                                |                                                                                              |                                                                                     |
| <b>Time frame: past 36 months</b>                         |                                                                                                                                                                                |                                                                                              |                                                                                     |
| 2                                                         | Grants or contracts from any entity (if not indicated in item #1 above).                                                                                                       | AbbVie                                                                                       | Grants to his institution                                                           |
|                                                           |                                                                                                                                                                                | Almirall                                                                                     |                                                                                     |
|                                                           |                                                                                                                                                                                | Janssen                                                                                      |                                                                                     |
|                                                           |                                                                                                                                                                                | LEO Pharma                                                                                   |                                                                                     |
|                                                           |                                                                                                                                                                                | Novartis                                                                                     |                                                                                     |
|                                                           |                                                                                                                                                                                | UCB Pharma                                                                                   |                                                                                     |
|                                                           |                                                                                                                                                                                |                                                                                              |                                                                                     |

|    |                                                                                                              |                      |  |
|----|--------------------------------------------------------------------------------------------------------------|----------------------|--|
|    |                                                                                                              |                      |  |
| 3  | Royalties or licenses                                                                                        | ___ None             |  |
|    |                                                                                                              |                      |  |
|    |                                                                                                              |                      |  |
| 4  | Consulting fees                                                                                              | AbbVie               |  |
|    |                                                                                                              | Almirall             |  |
|    |                                                                                                              | Amgen                |  |
|    |                                                                                                              | Arena                |  |
|    |                                                                                                              | Astellas             |  |
|    |                                                                                                              | Avillion             |  |
|    |                                                                                                              | BMS                  |  |
|    |                                                                                                              | Boehringer Ingelheim |  |
|    |                                                                                                              | Celgene              |  |
|    |                                                                                                              | Eli Lilly            |  |
|    |                                                                                                              | GSK                  |  |
|    |                                                                                                              | Janssen              |  |
|    |                                                                                                              | LEO Pharma           |  |
|    |                                                                                                              | Novartis             |  |
|    |                                                                                                              | Pfizer               |  |
|    |                                                                                                              | Sanofi               |  |
|    |                                                                                                              | UCB Pharma           |  |
| 5  | Payment or honoraria for lectures, presentations, speakers bureaus, manuscript writing or educational events | _ None               |  |
|    |                                                                                                              |                      |  |
|    |                                                                                                              |                      |  |
|    |                                                                                                              |                      |  |
|    |                                                                                                              |                      |  |
|    |                                                                                                              |                      |  |
|    |                                                                                                              |                      |  |
|    |                                                                                                              |                      |  |
|    |                                                                                                              |                      |  |
|    |                                                                                                              |                      |  |
|    |                                                                                                              |                      |  |
|    |                                                                                                              |                      |  |
| 6  | Payment for expert testimony                                                                                 | ___ None             |  |
|    |                                                                                                              |                      |  |
|    |                                                                                                              |                      |  |
| 7  | Support for attending meetings and/or travel                                                                 | ___ None             |  |
|    |                                                                                                              |                      |  |
|    |                                                                                                              |                      |  |
| 8  | Patents planned, issued or pending                                                                           | ___ None             |  |
|    |                                                                                                              |                      |  |
|    |                                                                                                              |                      |  |
| 9  | Participation on a Data Safety Monitoring Board or Advisory Board                                            | ___ None             |  |
|    |                                                                                                              |                      |  |
|    |                                                                                                              |                      |  |
| 10 | Leadership or fiduciary role in other board, society,                                                        | ___ None             |  |
|    |                                                                                                              |                      |  |
|    |                                                                                                              |                      |  |

|    |                                                                                  |                                       |                        |
|----|----------------------------------------------------------------------------------|---------------------------------------|------------------------|
|    | committee or advocacy group, paid or unpaid                                      |                                       |                        |
| 11 | Stock or stock options                                                           | <u>    </u> None                      |                        |
|    |                                                                                  |                                       |                        |
|    |                                                                                  |                                       |                        |
| 12 | Receipt of equipment, materials, drugs, medical writing, gifts or other services | <u>    </u> None                      |                        |
|    |                                                                                  |                                       |                        |
|    |                                                                                  |                                       |                        |
| 13 | Other financial or non-financial interests                                       | Dermavant<br>LEO Pharma<br>UCB Pharma | Principal investigator |

Please place an "X" next to the following statement to indicate your agreement:

  X   I certify that I have answered every question and have not altered the wording of any of the questions on this Form.

## ICMJE DISCLOSURE FORM

**Date:** 9 May 2022

**Your Name:** Arthur Kavanaugh

**Manuscript Title:** Safety and Efficacy of Bimekizumab in Patients with Active Psoriatic Arthritis: 3-Year Results from a Phase 2b Randomized Controlled Trial and its Open-Label Extension Study

**Manuscript number (if known):** ar-22-0051.R1

In the interest of transparency, we ask you to disclose all relationships/activities/interests listed below that are related to the content of your manuscript. "Related" means any relation with for-profit or not-for-profit third parties whose interests may be affected by the content of the manuscript. Disclosure represents a commitment to transparency and does not necessarily indicate a bias. If you are in doubt about whether to list a relationship/activity/interest, it is preferable that you do so.

The following questions apply to the author's relationships/activities/interests as they relate to the current manuscript only.

The author's relationships/activities/interests should be defined broadly. For example, if your manuscript pertains to the epidemiology of hypertension, you should declare all relationships with manufacturers of antihypertensive medication, even if that medication is not mentioned in the manuscript.

In item #1 below, report all support for the work reported in this manuscript without time limit. For all other items, the time frame for disclosure is the past 36 months.

|                                                           |                                                                                                                                                                                | Name all entities with whom you have this relationship or indicate none (add rows as needed) | Specifications/Comments (e.g., if payments were made to you or to your institution) |
|-----------------------------------------------------------|--------------------------------------------------------------------------------------------------------------------------------------------------------------------------------|----------------------------------------------------------------------------------------------|-------------------------------------------------------------------------------------|
| <b>Time frame: Since the initial planning of the work</b> |                                                                                                                                                                                |                                                                                              |                                                                                     |
| 1                                                         | All support for the present manuscript (e.g., funding, provision of study materials, medical writing, article processing charges, etc.)<br><b>No time limit for this item.</b> | UCB Pharma                                                                                   |                                                                                     |
|                                                           |                                                                                                                                                                                | Costello Medical                                                                             |                                                                                     |
|                                                           |                                                                                                                                                                                |                                                                                              |                                                                                     |
|                                                           |                                                                                                                                                                                |                                                                                              |                                                                                     |
|                                                           |                                                                                                                                                                                |                                                                                              |                                                                                     |
|                                                           |                                                                                                                                                                                |                                                                                              |                                                                                     |
|                                                           |                                                                                                                                                                                |                                                                                              |                                                                                     |
| <b>Time frame: past 36 months</b>                         |                                                                                                                                                                                |                                                                                              |                                                                                     |
| 2                                                         | Grants or contracts from any entity (if not indicated in item #1 above).                                                                                                       | Abbott                                                                                       |                                                                                     |
|                                                           |                                                                                                                                                                                | Amgen                                                                                        |                                                                                     |
|                                                           |                                                                                                                                                                                | BMS                                                                                          |                                                                                     |
|                                                           |                                                                                                                                                                                | Pfizer                                                                                       |                                                                                     |
|                                                           |                                                                                                                                                                                | Roche                                                                                        |                                                                                     |
|                                                           |                                                                                                                                                                                | Janssen                                                                                      |                                                                                     |
|                                                           |                                                                                                                                                                                | UCB Pharma                                                                                   |                                                                                     |
|                                                           |                                                                                                                                                                                |                                                                                              |                                                                                     |

|    |                                                                                                              |          |  |
|----|--------------------------------------------------------------------------------------------------------------|----------|--|
|    |                                                                                                              |          |  |
| 3  | Royalties or licenses                                                                                        | ___ None |  |
|    |                                                                                                              |          |  |
|    |                                                                                                              |          |  |
| 4  | Consulting fees                                                                                              | _ None   |  |
|    |                                                                                                              |          |  |
|    |                                                                                                              |          |  |
|    |                                                                                                              |          |  |
|    |                                                                                                              |          |  |
|    |                                                                                                              |          |  |
|    |                                                                                                              |          |  |
|    |                                                                                                              |          |  |
|    |                                                                                                              |          |  |
|    |                                                                                                              |          |  |
|    |                                                                                                              |          |  |
| 5  | Payment or honoraria for lectures, presentations, speakers bureaus, manuscript writing or educational events | _ None   |  |
|    |                                                                                                              |          |  |
|    |                                                                                                              |          |  |
|    |                                                                                                              |          |  |
|    |                                                                                                              |          |  |
|    |                                                                                                              |          |  |
|    |                                                                                                              |          |  |
|    |                                                                                                              |          |  |
|    |                                                                                                              |          |  |
|    |                                                                                                              |          |  |
|    |                                                                                                              |          |  |
|    |                                                                                                              |          |  |
| 6  | Payment for expert testimony                                                                                 | ___ None |  |
|    |                                                                                                              |          |  |
|    |                                                                                                              |          |  |
| 7  | Support for attending meetings and/or travel                                                                 | ___ None |  |
|    |                                                                                                              |          |  |
|    |                                                                                                              |          |  |
| 8  | Patents planned, issued or pending                                                                           | ___ None |  |
|    |                                                                                                              |          |  |
|    |                                                                                                              |          |  |
| 9  | Participation on a Data Safety Monitoring Board or Advisory Board                                            | ___ None |  |
|    |                                                                                                              |          |  |
|    |                                                                                                              |          |  |
| 10 | Leadership or fiduciary role in other board, society, committee or advocacy group, paid or unpaid            | ___ None |  |
|    |                                                                                                              |          |  |
|    |                                                                                                              |          |  |
| 11 | Stock or stock options                                                                                       | ___ None |  |
|    |                                                                                                              |          |  |
|    |                                                                                                              |          |  |
| 12 |                                                                                                              | ___ None |  |

|    |                                                                                  |                  |  |
|----|----------------------------------------------------------------------------------|------------------|--|
|    | Receipt of equipment, materials, drugs, medical writing, gifts or other services |                  |  |
| 13 | Other financial or non-financial interests                                       | <u>    </u> None |  |
|    |                                                                                  |                  |  |
|    |                                                                                  |                  |  |

Please place an "X" next to the following statement to indicate your agreement:

  X   I certify that I have answered every question and have not altered the wording of any of the questions on this form.

## ICMJE DISCLOSURE FORM

**Date:** 9 May 2022

**Your Name:** Alice B. Gottlieb

**Manuscript Title:** Safety and Efficacy of Bimekizumab in Patients with Active Psoriatic Arthritis: 3-Year Results from a Phase 2b Randomized Controlled Trial and its Open-Label Extension Study

**Manuscript number (if known):** ar-22-0051.R1

In the interest of transparency, we ask you to disclose all relationships/activities/interests listed below that are related to the content of your manuscript. "Related" means any relation with for-profit or not-for-profit third parties whose interests may be affected by the content of the manuscript. Disclosure represents a commitment to transparency and does not necessarily indicate a bias. If you are in doubt about whether to list a relationship/activity/interest, it is preferable that you do so.

The following questions apply to the author's relationships/activities/interests as they relate to the current manuscript only.

The author's relationships/activities/interests should be defined broadly. For example, if your manuscript pertains to the epidemiology of hypertension, you should declare all relationships with manufacturers of antihypertensive medication, even if that medication is not mentioned in the manuscript.

In item #1 below, report all support for the work reported in this manuscript without time limit. For all other items, the time frame for disclosure is the past 36 months.

|                                                           |                                                                                                                                                                                | Name all entities with whom you have this relationship or indicate none (add rows as needed) | Specifications/Comments (e.g., if payments were made to you or to your institution) |
|-----------------------------------------------------------|--------------------------------------------------------------------------------------------------------------------------------------------------------------------------------|----------------------------------------------------------------------------------------------|-------------------------------------------------------------------------------------|
| <b>Time frame: Since the initial planning of the work</b> |                                                                                                                                                                                |                                                                                              |                                                                                     |
| 1                                                         | All support for the present manuscript (e.g., funding, provision of study materials, medical writing, article processing charges, etc.)<br><b>No time limit for this item.</b> | UCB Pharma                                                                                   |                                                                                     |
|                                                           |                                                                                                                                                                                | Costello Medical                                                                             |                                                                                     |
|                                                           |                                                                                                                                                                                |                                                                                              |                                                                                     |
|                                                           |                                                                                                                                                                                |                                                                                              |                                                                                     |
|                                                           |                                                                                                                                                                                |                                                                                              |                                                                                     |
|                                                           |                                                                                                                                                                                |                                                                                              |                                                                                     |
|                                                           |                                                                                                                                                                                |                                                                                              |                                                                                     |
| <b>Time frame: past 36 months</b>                         |                                                                                                                                                                                |                                                                                              |                                                                                     |
| 2                                                         | Grants or contracts from any entity (if not indicated in item #1 above).                                                                                                       | Boehringer Ingelheim                                                                         | Paid to Mount Sinai Medical School                                                  |
|                                                           |                                                                                                                                                                                | Incyte                                                                                       |                                                                                     |
|                                                           |                                                                                                                                                                                | Janssen                                                                                      |                                                                                     |
|                                                           |                                                                                                                                                                                | Novartis                                                                                     |                                                                                     |
|                                                           |                                                                                                                                                                                | Sun Pharma                                                                                   |                                                                                     |
|                                                           |                                                                                                                                                                                | UCB Pharma                                                                                   |                                                                                     |
|                                                           |                                                                                                                                                                                | XBiotech                                                                                     |                                                                                     |



|    |                                                                                                              |                      |  |
|----|--------------------------------------------------------------------------------------------------------------|----------------------|--|
|    |                                                                                                              |                      |  |
| 3  | Royalties or licenses                                                                                        | ___ None             |  |
|    |                                                                                                              |                      |  |
|    |                                                                                                              |                      |  |
| 4  | Consulting fees                                                                                              | Anaptyps Bio         |  |
|    |                                                                                                              | Avotres Therapeutics |  |
|    |                                                                                                              | Beiersdorf           |  |
|    |                                                                                                              | BMS                  |  |
|    |                                                                                                              | Boehringer Ingelheim |  |
|    |                                                                                                              | Eli Lilly            |  |
|    |                                                                                                              | Incyte               |  |
|    |                                                                                                              | Janssen              |  |
|    |                                                                                                              | LEO Pharma           |  |
|    |                                                                                                              | Novartis             |  |
|    |                                                                                                              | Pfizer               |  |
|    |                                                                                                              | Sun Pharma           |  |
|    |                                                                                                              | UCB Pharma           |  |
| 5  | Payment or honoraria for lectures, presentations, speakers bureaus, manuscript writing or educational events | Anaptyps Bio         |  |
|    |                                                                                                              | Avotres Therapeutics |  |
|    |                                                                                                              | Beiersdorf           |  |
|    |                                                                                                              | BMS                  |  |
|    |                                                                                                              | Boehringer Ingelheim |  |
|    |                                                                                                              | Eli Lilly            |  |
|    |                                                                                                              | Incyte               |  |
|    |                                                                                                              | Janssen              |  |
|    |                                                                                                              | LEO Pharma           |  |
|    |                                                                                                              | Novartis             |  |
|    |                                                                                                              | Pfizer               |  |
|    |                                                                                                              | Sun Pharma           |  |
| 6  | Payment for expert testimony                                                                                 | ___ None             |  |
|    |                                                                                                              |                      |  |
|    |                                                                                                              |                      |  |
| 7  | Support for attending meetings and/or travel                                                                 | ___ None             |  |
|    |                                                                                                              |                      |  |
|    |                                                                                                              |                      |  |
| 8  | Patents planned, issued or pending                                                                           | ___ None             |  |
|    |                                                                                                              |                      |  |
|    |                                                                                                              |                      |  |
| 9  | Participation on a Data Safety Monitoring Board or Advisory Board                                            | ___ None             |  |
|    |                                                                                                              |                      |  |
|    |                                                                                                              |                      |  |
| 10 | Leadership or fiduciary role in other board, society, committee or advocacy group, paid or unpaid            | ___ None             |  |
|    |                                                                                                              |                      |  |
|    |                                                                                                              |                      |  |
| 11 | Stock or stock options                                                                                       | XBiotech             |  |
|    |                                                                                                              |                      |  |
|    |                                                                                                              |                      |  |

|    |                                                                                  |                  |  |
|----|----------------------------------------------------------------------------------|------------------|--|
| 12 | Receipt of equipment, materials, drugs, medical writing, gifts or other services | <u>    </u> None |  |
|    |                                                                                  |                  |  |
|    |                                                                                  |                  |  |
| 13 | Other financial or non-financial interests                                       | <u>    </u> None |  |
|    |                                                                                  |                  |  |
|    |                                                                                  |                  |  |

Please place an "X" next to the following statement to indicate your agreement:

  X   I certify that I have answered every question and have not altered the wording of any of the questions on this form.

## ICMJE DISCLOSURE FORM

**Date:** 9 May 2022

**Your Name:** Laure Gossec

**Manuscript Title:** Safety and Efficacy of Bimekizumab in Patients with Active Psoriatic Arthritis: 3-Year Results from a Phase 2b Randomized Controlled Trial and its Open-Label Extension Study

**Manuscript number (if known):** ar-22-0051.R1

In the interest of transparency, we ask you to disclose all relationships/activities/interests listed below that are related to the content of your manuscript. “Related” means any relation with for-profit or not-for-profit third parties whose interests may be affected by the content of the manuscript. Disclosure represents a commitment to transparency and does not necessarily indicate a bias. If you are in doubt about whether to list a relationship/activity/interest, it is preferable that you do so.

The following questions apply to the author’s relationships/activities/interests as they relate to the current manuscript only.

The author’s relationships/activities/interests should be defined broadly. For example, if your manuscript pertains to the epidemiology of hypertension, you should declare all relationships with manufacturers of antihypertensive medication, even if that medication is not mentioned in the manuscript.

In item #1 below, report all support for the work reported in this manuscript without time limit. For all other items, the time frame for disclosure is the past 36 months.

|                                                           |                                                                                                                                                                                | Name all entities with whom you have this relationship or indicate none (add rows as needed) | Specifications/Comments (e.g., if payments were made to you or to your institution) |
|-----------------------------------------------------------|--------------------------------------------------------------------------------------------------------------------------------------------------------------------------------|----------------------------------------------------------------------------------------------|-------------------------------------------------------------------------------------|
| <b>Time frame: Since the initial planning of the work</b> |                                                                                                                                                                                |                                                                                              |                                                                                     |
| 1                                                         | All support for the present manuscript (e.g., funding, provision of study materials, medical writing, article processing charges, etc.)<br><b>No time limit for this item.</b> | UCB Pharma                                                                                   |                                                                                     |
|                                                           |                                                                                                                                                                                | Costello Medical                                                                             |                                                                                     |
|                                                           |                                                                                                                                                                                |                                                                                              |                                                                                     |
|                                                           |                                                                                                                                                                                |                                                                                              |                                                                                     |
|                                                           |                                                                                                                                                                                |                                                                                              |                                                                                     |
|                                                           |                                                                                                                                                                                |                                                                                              |                                                                                     |
|                                                           |                                                                                                                                                                                |                                                                                              |                                                                                     |
| <b>Time frame: past 36 months</b>                         |                                                                                                                                                                                |                                                                                              |                                                                                     |
| 2                                                         | Grants or contracts from any entity (if not indicated in item #1 above).                                                                                                       | Amgen                                                                                        |                                                                                     |
|                                                           |                                                                                                                                                                                | Galapagos                                                                                    |                                                                                     |
|                                                           |                                                                                                                                                                                | Eli Lilly                                                                                    |                                                                                     |
|                                                           |                                                                                                                                                                                | Pfizer                                                                                       |                                                                                     |
|                                                           |                                                                                                                                                                                | Sandoz                                                                                       |                                                                                     |
|                                                           |                                                                                                                                                                                | Sanofi                                                                                       |                                                                                     |
|                                                           |                                                                                                                                                                                |                                                                                              |                                                                                     |

|    |                                                                                                              |                 |  |
|----|--------------------------------------------------------------------------------------------------------------|-----------------|--|
|    |                                                                                                              |                 |  |
| 3  | Royalties or licenses                                                                                        | ___ None        |  |
|    |                                                                                                              |                 |  |
|    |                                                                                                              |                 |  |
| 4  | Consulting fees                                                                                              | AbbVie          |  |
|    |                                                                                                              | Amgen           |  |
|    |                                                                                                              | BMS             |  |
|    |                                                                                                              | Biogen          |  |
|    |                                                                                                              | Celgene         |  |
|    |                                                                                                              | Eli Lilly       |  |
|    |                                                                                                              | Galapagos       |  |
|    |                                                                                                              | Gilead          |  |
|    |                                                                                                              | Janssen         |  |
|    |                                                                                                              | Novartis        |  |
|    |                                                                                                              | Pfizer          |  |
|    |                                                                                                              | Samsung Bioepis |  |
|    |                                                                                                              | Sanofi-Aventis  |  |
|    |                                                                                                              | UCB Pharma      |  |
| 5  | Payment or honoraria for lectures, presentations, speakers bureaus, manuscript writing or educational events | _ None          |  |
|    |                                                                                                              |                 |  |
|    |                                                                                                              |                 |  |
|    |                                                                                                              |                 |  |
|    |                                                                                                              |                 |  |
|    |                                                                                                              |                 |  |
|    |                                                                                                              |                 |  |
|    |                                                                                                              |                 |  |
|    |                                                                                                              |                 |  |
|    |                                                                                                              |                 |  |
|    |                                                                                                              |                 |  |
|    |                                                                                                              |                 |  |
| 6  | Payment for expert testimony                                                                                 | ___ None        |  |
|    |                                                                                                              |                 |  |
|    |                                                                                                              |                 |  |
| 7  | Support for attending meetings and/or travel                                                                 | ___ None        |  |
|    |                                                                                                              |                 |  |
|    |                                                                                                              |                 |  |
| 8  | Patents planned, issued or pending                                                                           | ___ None        |  |
|    |                                                                                                              |                 |  |
|    |                                                                                                              |                 |  |
| 9  | Participation on a Data Safety Monitoring Board or Advisory Board                                            | ___ None        |  |
|    |                                                                                                              |                 |  |
|    |                                                                                                              |                 |  |
| 10 | Leadership or fiduciary role in other board, society, committee or advocacy group, paid or unpaid            | ___ None        |  |
|    |                                                                                                              |                 |  |
|    |                                                                                                              |                 |  |
| 11 | Stock or stock options                                                                                       | ___ None        |  |
|    |                                                                                                              |                 |  |

|    |                                                                                  |                  |  |
|----|----------------------------------------------------------------------------------|------------------|--|
|    |                                                                                  |                  |  |
| 12 | Receipt of equipment, materials, drugs, medical writing, gifts or other services | <u>    </u> None |  |
|    |                                                                                  |                  |  |
|    |                                                                                  |                  |  |
| 13 | Other financial or non-financial interests                                       | <u>    </u> None |  |
|    |                                                                                  |                  |  |
|    |                                                                                  |                  |  |

Please place an "X" next to the following statement to indicate your agreement:

  X   I certify that I have answered every question and have not altered the wording of any of the questions on this form.



|    |                                                                                                              |            |  |
|----|--------------------------------------------------------------------------------------------------------------|------------|--|
|    |                                                                                                              |            |  |
| 3  | Royalties or licenses                                                                                        | ___ None   |  |
|    |                                                                                                              |            |  |
|    |                                                                                                              |            |  |
| 4  | Consulting fees                                                                                              | _ None     |  |
|    |                                                                                                              |            |  |
|    |                                                                                                              |            |  |
|    |                                                                                                              |            |  |
|    |                                                                                                              |            |  |
|    |                                                                                                              |            |  |
|    |                                                                                                              |            |  |
|    |                                                                                                              |            |  |
|    |                                                                                                              |            |  |
|    |                                                                                                              |            |  |
|    |                                                                                                              |            |  |
| 5  | Payment or honoraria for lectures, presentations, speakers bureaus, manuscript writing or educational events | _ None     |  |
|    |                                                                                                              |            |  |
|    |                                                                                                              |            |  |
|    |                                                                                                              |            |  |
|    |                                                                                                              |            |  |
|    |                                                                                                              |            |  |
|    |                                                                                                              |            |  |
|    |                                                                                                              |            |  |
|    |                                                                                                              |            |  |
|    |                                                                                                              |            |  |
|    |                                                                                                              |            |  |
| 6  | Payment for expert testimony                                                                                 | ___ None   |  |
|    |                                                                                                              |            |  |
|    |                                                                                                              |            |  |
| 7  | Support for attending meetings and/or travel                                                                 | ___ None   |  |
|    |                                                                                                              |            |  |
|    |                                                                                                              |            |  |
| 8  | Patents planned, issued or pending                                                                           | ___ None   |  |
|    |                                                                                                              |            |  |
|    |                                                                                                              |            |  |
| 9  | Participation on a Data Safety Monitoring Board or Advisory Board                                            | ___ None   |  |
|    |                                                                                                              |            |  |
|    |                                                                                                              |            |  |
| 10 | Leadership or fiduciary role in other board, society, committee or advocacy group, paid or unpaid            | ___ None   |  |
|    |                                                                                                              |            |  |
|    |                                                                                                              |            |  |
| 11 | Stock or stock options                                                                                       | UCB Pharma |  |
|    |                                                                                                              |            |  |
|    |                                                                                                              |            |  |
| 12 |                                                                                                              | ___ None   |  |

|    |                                                                                  |            |          |
|----|----------------------------------------------------------------------------------|------------|----------|
|    | Receipt of equipment, materials, drugs, medical writing, gifts or other services |            |          |
| 13 | Other financial or non-financial interests                                       | UCB Pharma | Employee |
|    |                                                                                  |            |          |
|    |                                                                                  |            |          |

Please place an "X" next to the following statement to indicate your agreement:

X I certify that I have answered every question and have not altered the wording of any of the questions on this form.





|    |                                                                                                              |            |  |
|----|--------------------------------------------------------------------------------------------------------------|------------|--|
| 3  | Royalties or licenses                                                                                        | ___ None   |  |
| 4  | Consulting fees                                                                                              | _ None     |  |
| 5  | Payment or honoraria for lectures, presentations, speakers bureaus, manuscript writing or educational events | _ None     |  |
| 6  | Payment for expert testimony                                                                                 | ___ None   |  |
| 7  | Support for attending meetings and/or travel                                                                 | ___ None   |  |
| 8  | Patents planned, issued or pending                                                                           | ___ None   |  |
| 9  | Participation on a Data Safety Monitoring Board or Advisory Board                                            | ___ None   |  |
| 10 | Leadership or fiduciary role in other board, society, committee or advocacy group, paid or unpaid            | ___ None   |  |
| 11 | Stock or stock options                                                                                       | UCB Pharma |  |
| 12 |                                                                                                              | ___ None   |  |

|    |                                                                                  |            |          |
|----|----------------------------------------------------------------------------------|------------|----------|
|    | Receipt of equipment, materials, drugs, medical writing, gifts or other services |            |          |
| 13 | Other financial or non-financial interests                                       | UCB Pharma | Employee |
|    |                                                                                  |            |          |
|    |                                                                                  |            |          |

Please place an "X" next to the following statement to indicate your agreement:

X I certify that I have answered every question and have not altered the wording of any of the questions on this form.



|    |                                                                                                              |            |  |
|----|--------------------------------------------------------------------------------------------------------------|------------|--|
|    |                                                                                                              |            |  |
| 3  | Royalties or licenses                                                                                        | ___ None   |  |
|    |                                                                                                              |            |  |
|    |                                                                                                              |            |  |
| 4  | Consulting fees                                                                                              | _ None     |  |
|    |                                                                                                              |            |  |
|    |                                                                                                              |            |  |
|    |                                                                                                              |            |  |
|    |                                                                                                              |            |  |
|    |                                                                                                              |            |  |
|    |                                                                                                              |            |  |
|    |                                                                                                              |            |  |
|    |                                                                                                              |            |  |
|    |                                                                                                              |            |  |
| 5  | Payment or honoraria for lectures, presentations, speakers bureaus, manuscript writing or educational events | _ None     |  |
|    |                                                                                                              |            |  |
|    |                                                                                                              |            |  |
|    |                                                                                                              |            |  |
|    |                                                                                                              |            |  |
|    |                                                                                                              |            |  |
|    |                                                                                                              |            |  |
|    |                                                                                                              |            |  |
|    |                                                                                                              |            |  |
|    |                                                                                                              |            |  |
|    |                                                                                                              |            |  |
| 6  | Payment for expert testimony                                                                                 | ___ None   |  |
|    |                                                                                                              |            |  |
|    |                                                                                                              |            |  |
| 7  | Support for attending meetings and/or travel                                                                 | ___ None   |  |
|    |                                                                                                              |            |  |
|    |                                                                                                              |            |  |
| 8  | Patents planned, issued or pending                                                                           | ___ None   |  |
|    |                                                                                                              |            |  |
|    |                                                                                                              |            |  |
| 9  | Participation on a Data Safety Monitoring Board or Advisory Board                                            | ___ None   |  |
|    |                                                                                                              |            |  |
|    |                                                                                                              |            |  |
| 10 | Leadership or fiduciary role in other board, society, committee or advocacy group, paid or unpaid            | ___ None   |  |
|    |                                                                                                              |            |  |
|    |                                                                                                              |            |  |
| 11 | Stock or stock options                                                                                       | UCB Pharma |  |
|    |                                                                                                              |            |  |
|    |                                                                                                              |            |  |
| 12 |                                                                                                              | ___ None   |  |

|    |                                                                                  |            |          |
|----|----------------------------------------------------------------------------------|------------|----------|
|    | Receipt of equipment, materials, drugs, medical writing, gifts or other services |            |          |
| 13 | Other financial or non-financial interests                                       | UCB Pharma | Employee |
|    |                                                                                  |            |          |
|    |                                                                                  |            |          |

Please place an "X" next to the following statement to indicate your agreement:

X I certify that I have answered every question and have not altered the wording of any of the questions on this form.



|    |                                                                                                              |                   |  |
|----|--------------------------------------------------------------------------------------------------------------|-------------------|--|
|    |                                                                                                              |                   |  |
| 3  | Royalties or licenses                                                                                        | ___ None          |  |
|    |                                                                                                              |                   |  |
|    |                                                                                                              |                   |  |
| 4  | Consulting fees                                                                                              | _ None            |  |
|    |                                                                                                              |                   |  |
|    |                                                                                                              |                   |  |
|    |                                                                                                              |                   |  |
|    |                                                                                                              |                   |  |
|    |                                                                                                              |                   |  |
|    |                                                                                                              |                   |  |
|    |                                                                                                              |                   |  |
|    |                                                                                                              |                   |  |
|    |                                                                                                              |                   |  |
| 5  | Payment or honoraria for lectures, presentations, speakers bureaus, manuscript writing or educational events | _ None            |  |
|    |                                                                                                              |                   |  |
|    |                                                                                                              |                   |  |
|    |                                                                                                              |                   |  |
|    |                                                                                                              |                   |  |
|    |                                                                                                              |                   |  |
|    |                                                                                                              |                   |  |
|    |                                                                                                              |                   |  |
|    |                                                                                                              |                   |  |
|    |                                                                                                              |                   |  |
|    |                                                                                                              |                   |  |
| 6  | Payment for expert testimony                                                                                 | ___ None          |  |
|    |                                                                                                              |                   |  |
|    |                                                                                                              |                   |  |
| 7  | Support for attending meetings and/or travel                                                                 | ___ None          |  |
|    |                                                                                                              |                   |  |
|    |                                                                                                              |                   |  |
| 8  | Patents planned, issued or pending                                                                           | ___ None          |  |
|    |                                                                                                              |                   |  |
|    |                                                                                                              |                   |  |
| 9  | Participation on a Data Safety Monitoring Board or Advisory Board                                            | ___ None          |  |
|    |                                                                                                              |                   |  |
|    |                                                                                                              |                   |  |
| 10 | Leadership or fiduciary role in other board, society, committee or advocacy group, paid or unpaid            | ___ None          |  |
|    |                                                                                                              |                   |  |
|    |                                                                                                              |                   |  |
| 11 | Stock or stock options                                                                                       | UCB Pharma<br>GSK |  |
|    |                                                                                                              |                   |  |
|    |                                                                                                              |                   |  |
| 12 |                                                                                                              | ___ None          |  |



|    |                                                                                  |            |          |
|----|----------------------------------------------------------------------------------|------------|----------|
|    | Receipt of equipment, materials, drugs, medical writing, gifts or other services |            |          |
| 13 | Other financial or non-financial interests                                       | UCB Pharma | Employee |
|    |                                                                                  |            |          |
|    |                                                                                  |            |          |

Please place an "X" next to the following statement to indicate your agreement:

X I certify that I have answered every question and have not altered the wording of any of the questions on this form.

## ICMJE DISCLOSURE FORM

**Date:** 9 May 2022

**Your Name:** Christopher T. Ritchlin

**Manuscript Title:** Safety and Efficacy of Bimekizumab in Patients with Active Psoriatic Arthritis: 3-Year Results from a Phase 2b Randomized Controlled Trial and its Open-Label Extension Study

**Manuscript number (if known):** ar-22-0051.R1

In the interest of transparency, we ask you to disclose all relationships/activities/interests listed below that are related to the content of your manuscript. "Related" means any relation with for-profit or not-for-profit third parties whose interests may be affected by the content of the manuscript. Disclosure represents a commitment to transparency and does not necessarily indicate a bias. If you are in doubt about whether to list a relationship/activity/interest, it is preferable that you do so.

The following questions apply to the author's relationships/activities/interests as they relate to the current manuscript only.

The author's relationships/activities/interests should be defined broadly. For example, if your manuscript pertains to the epidemiology of hypertension, you should declare all relationships with manufacturers of antihypertensive medication, even if that medication is not mentioned in the manuscript.

In item #1 below, report all support for the work reported in this manuscript without time limit. For all other items, the time frame for disclosure is the past 36 months.

|                                                           |                                                                                                                                                                                | Name all entities with whom you have this relationship or indicate none (add rows as needed) | Specifications/Comments (e.g., if payments were made to you or to your institution) |
|-----------------------------------------------------------|--------------------------------------------------------------------------------------------------------------------------------------------------------------------------------|----------------------------------------------------------------------------------------------|-------------------------------------------------------------------------------------|
| <b>Time frame: Since the initial planning of the work</b> |                                                                                                                                                                                |                                                                                              |                                                                                     |
| 1                                                         | All support for the present manuscript (e.g., funding, provision of study materials, medical writing, article processing charges, etc.)<br><b>No time limit for this item.</b> | UCB Pharma                                                                                   |                                                                                     |
|                                                           |                                                                                                                                                                                | Costello Medical                                                                             |                                                                                     |
|                                                           |                                                                                                                                                                                |                                                                                              |                                                                                     |
|                                                           |                                                                                                                                                                                |                                                                                              |                                                                                     |
|                                                           |                                                                                                                                                                                |                                                                                              |                                                                                     |
|                                                           |                                                                                                                                                                                |                                                                                              |                                                                                     |
|                                                           |                                                                                                                                                                                |                                                                                              |                                                                                     |
| <b>Time frame: past 36 months</b>                         |                                                                                                                                                                                |                                                                                              |                                                                                     |
| 2                                                         | Grants or contracts from any entity (if not indicated in item #1 above).                                                                                                       | AbbVie                                                                                       |                                                                                     |
|                                                           |                                                                                                                                                                                | Amgen                                                                                        |                                                                                     |
|                                                           |                                                                                                                                                                                | UCB Pharma                                                                                   |                                                                                     |
|                                                           |                                                                                                                                                                                |                                                                                              |                                                                                     |
|                                                           |                                                                                                                                                                                |                                                                                              |                                                                                     |
|                                                           |                                                                                                                                                                                |                                                                                              |                                                                                     |
|                                                           |                                                                                                                                                                                |                                                                                              |                                                                                     |

|    |                                                                                                              |            |  |
|----|--------------------------------------------------------------------------------------------------------------|------------|--|
|    |                                                                                                              |            |  |
| 3  | Royalties or licenses                                                                                        | ___ None   |  |
|    |                                                                                                              |            |  |
|    |                                                                                                              |            |  |
| 4  | Consulting fees                                                                                              | AbbVie     |  |
|    |                                                                                                              | Amgen      |  |
|    |                                                                                                              | Eli Lilly  |  |
|    |                                                                                                              | Gilead     |  |
|    |                                                                                                              | Janssen    |  |
|    |                                                                                                              | Novartis   |  |
|    |                                                                                                              | Pfizer     |  |
|    |                                                                                                              | UCB Pharma |  |
|    |                                                                                                              |            |  |
|    |                                                                                                              |            |  |
|    |                                                                                                              |            |  |
| 5  | Payment or honoraria for lectures, presentations, speakers bureaus, manuscript writing or educational events | _ None     |  |
|    |                                                                                                              |            |  |
|    |                                                                                                              |            |  |
|    |                                                                                                              |            |  |
|    |                                                                                                              |            |  |
|    |                                                                                                              |            |  |
|    |                                                                                                              |            |  |
|    |                                                                                                              |            |  |
|    |                                                                                                              |            |  |
|    |                                                                                                              |            |  |
| 6  | Payment for expert testimony                                                                                 | ___ None   |  |
|    |                                                                                                              |            |  |
|    |                                                                                                              |            |  |
| 7  | Support for attending meetings and/or travel                                                                 | ___ None   |  |
|    |                                                                                                              |            |  |
|    |                                                                                                              |            |  |
| 8  | Patents planned, issued or pending                                                                           | ___ None   |  |
|    |                                                                                                              |            |  |
|    |                                                                                                              |            |  |
| 9  | Participation on a Data Safety Monitoring Board or Advisory Board                                            | ___ None   |  |
|    |                                                                                                              |            |  |
|    |                                                                                                              |            |  |
| 10 | Leadership or fiduciary role in other board, society, committee or advocacy group, paid or unpaid            | ___ None   |  |
|    |                                                                                                              |            |  |
|    |                                                                                                              |            |  |
| 11 | Stock or stock options                                                                                       | _ None     |  |
|    |                                                                                                              |            |  |
|    |                                                                                                              |            |  |
| 12 |                                                                                                              | ___ None   |  |

|    |                                                                                  |             |  |
|----|----------------------------------------------------------------------------------|-------------|--|
|    | Receipt of equipment, materials, drugs, medical writing, gifts or other services |             |  |
| 13 | Other financial or non-financial interests                                       | <u>None</u> |  |
|    |                                                                                  |             |  |
|    |                                                                                  |             |  |

Please place an "X" next to the following statement to indicate your agreement:

X I certify that I have answered every question and have not altered the wording of any of the questions on this form.
