# Supplementary figures and images for: Safety and Efficacy of Bimekizumab in Patients With Active Psoriatic Arthritis: Three‐Year Results From a Phase IIb Randomized Controlled Trial and Its Open‐Label Extension Study
Source: PubMed Central journal article supplement — Arthritis Rheumatol. 2022 Nov 18;74(12):1959–70. doi: 10.1002/art.42280 (PMC10100448; doi:10.1002/art.42280), 2022-11-18

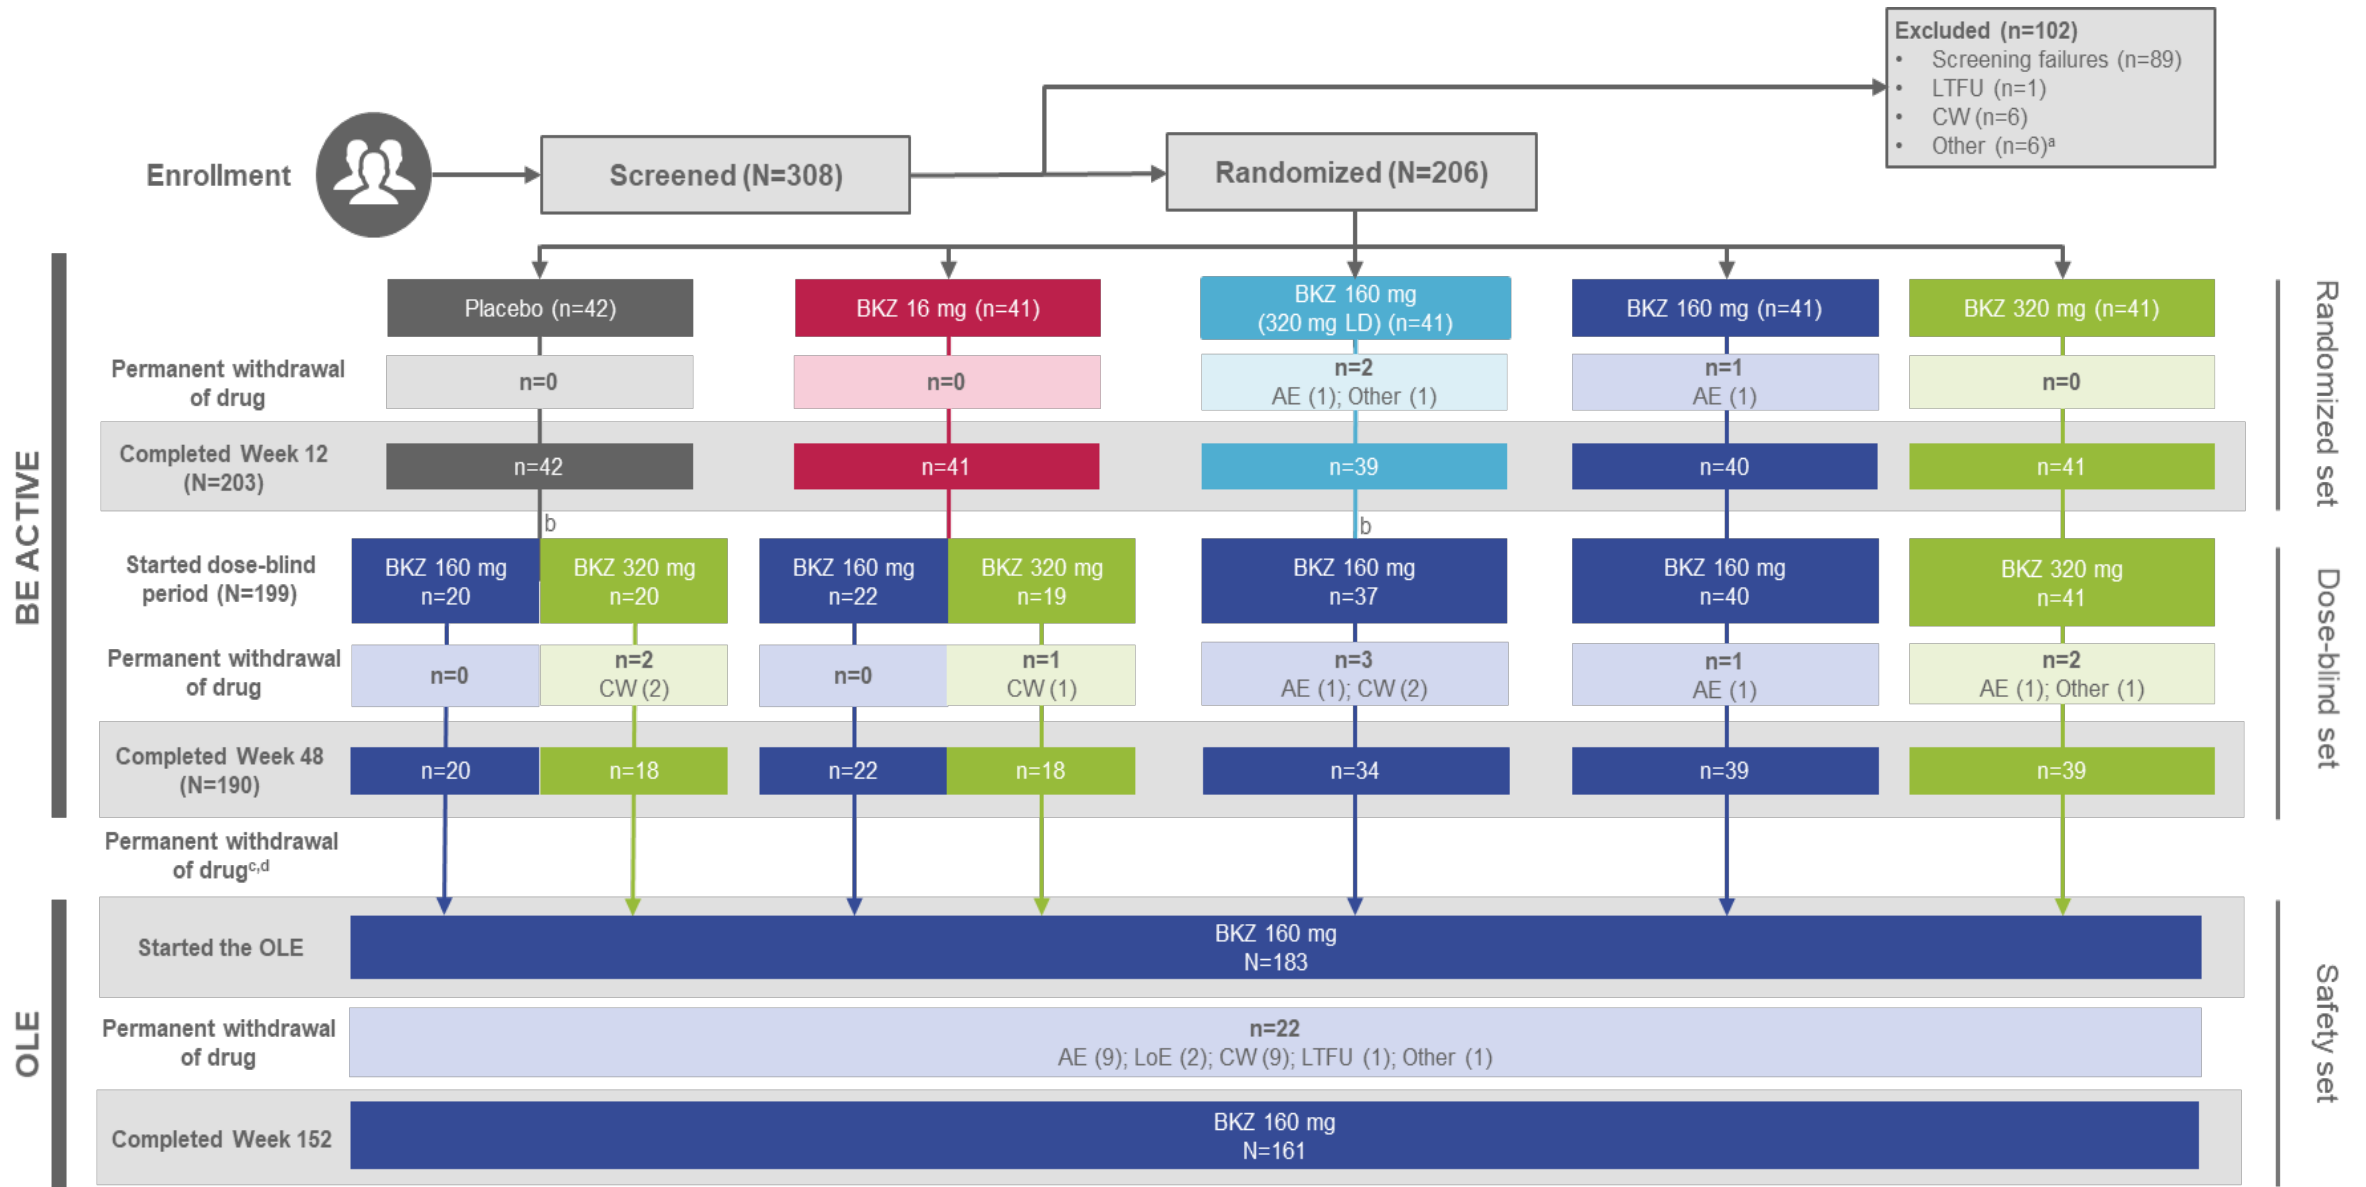

Supplement: ART-74-1959-s001.pdf [file ART-74-1959-s001.pdf]

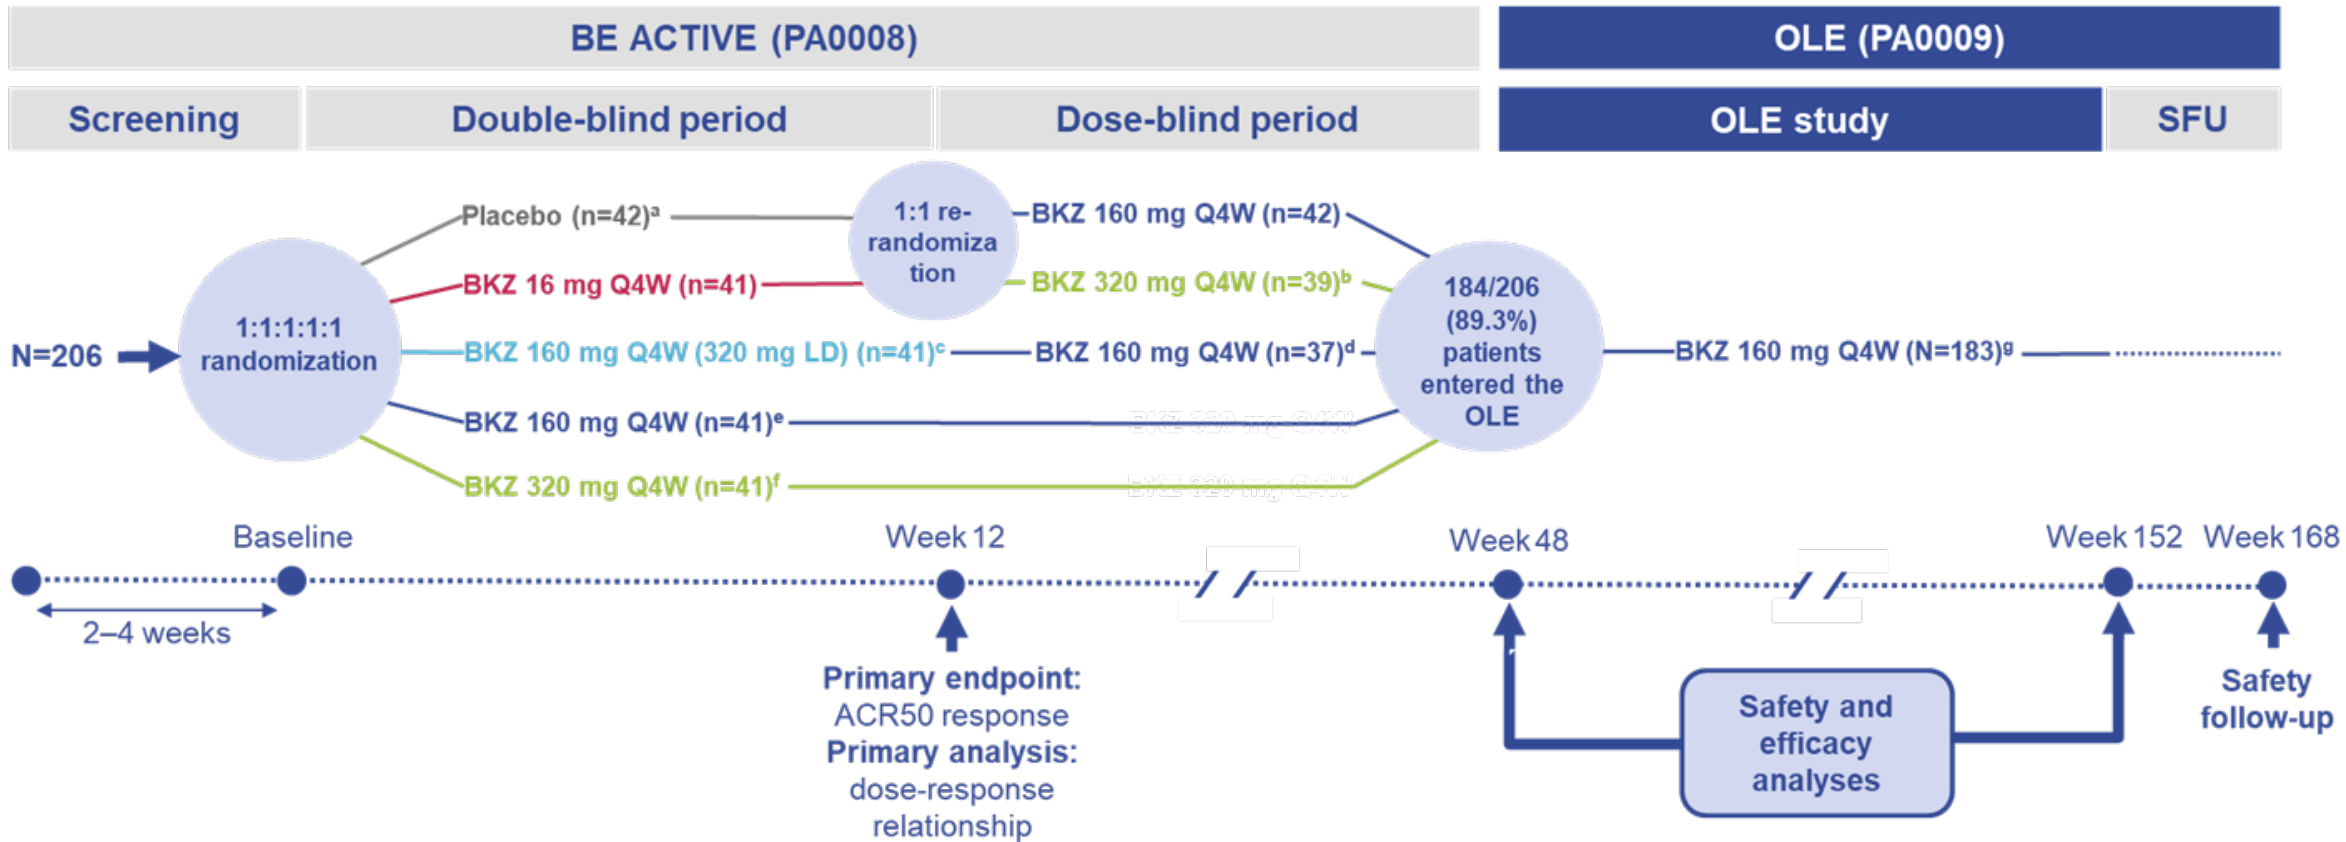

Supplement: ART-74-1959-s004.pdf [file ART-74-1959-s004.pdf]

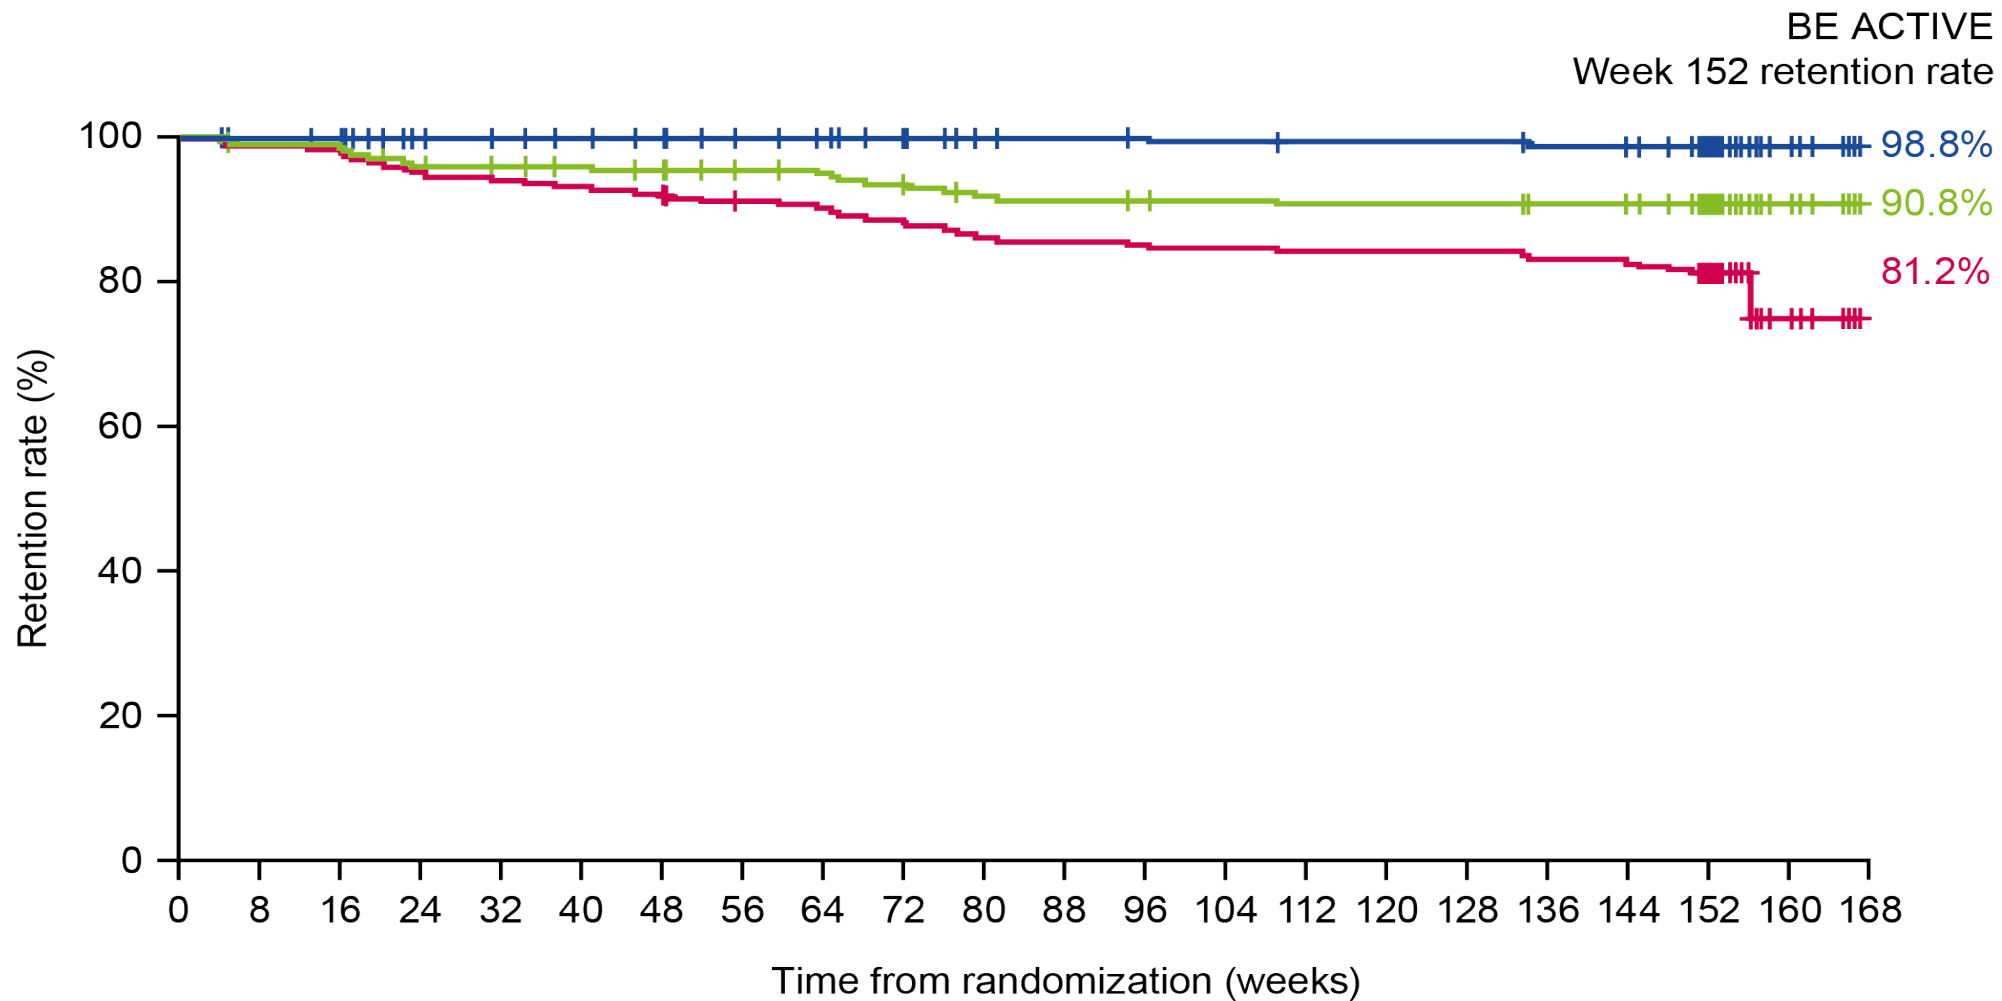

—+— Withdrawal due to any reason    —+— Withdrawal due to AEs    —+— Withdrawal due to lack of efficacy

Supplement: ART-74-1959-s005.pdf [file ART-74-1959-s005.pdf]
